# Supplementary material
Source: PubMed Central journal article supplement (PMC8223741)
Supplement: NIHMS1707344-supplement-Supplementary_Data_Cormack.pdf [file NIHMS1707344-supplement-Supplementary_Data_Cormack.pdf]

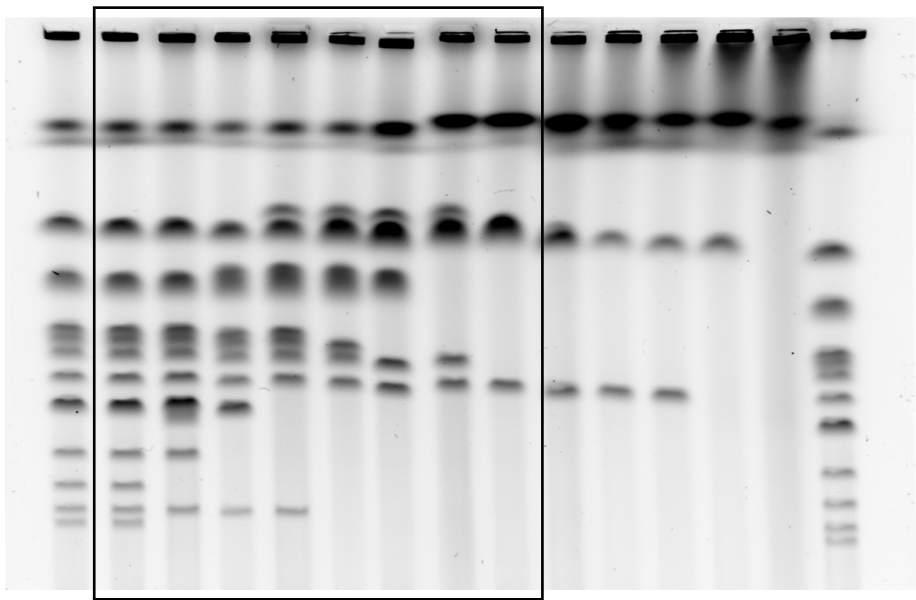

Figure 2b

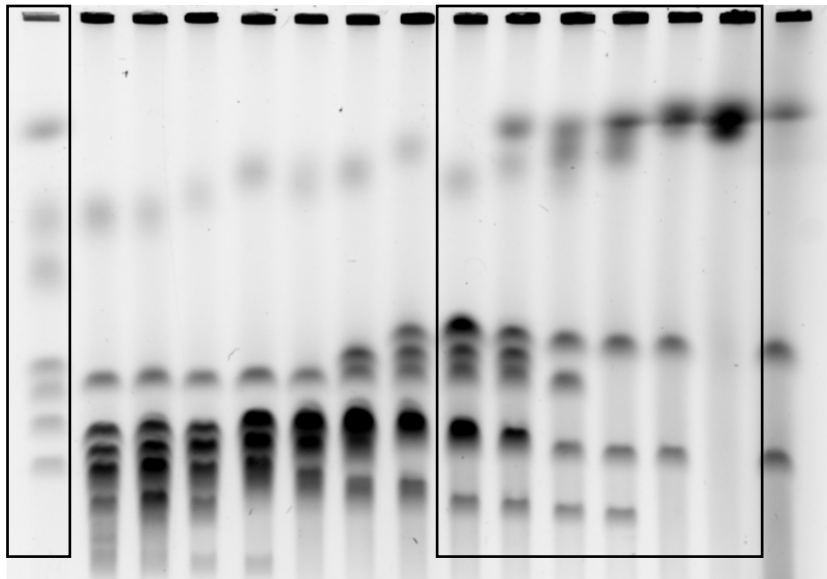

Figure 2c

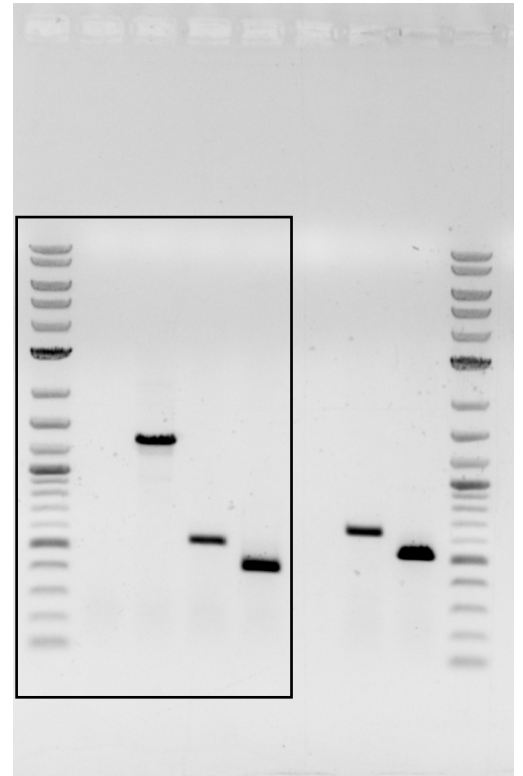

Extended Figure 1a

*S.pombe*

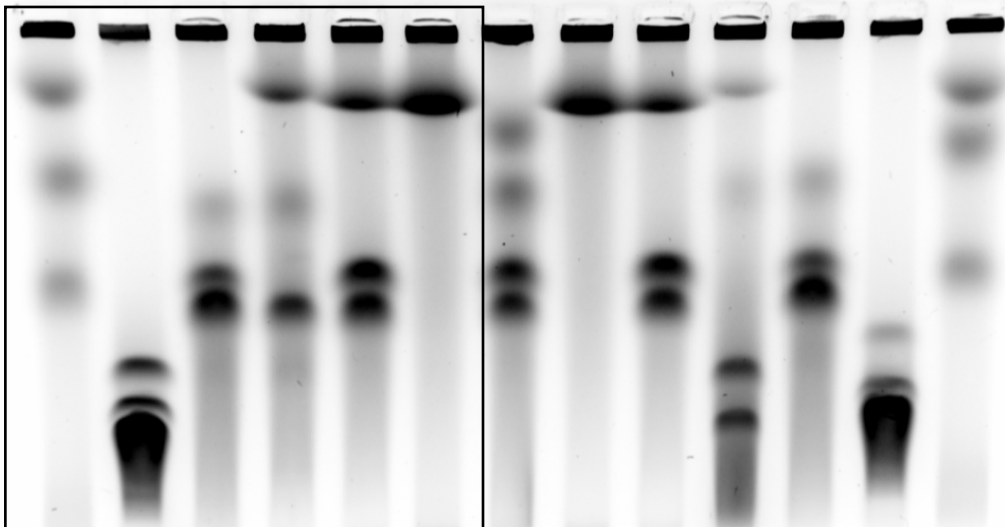

Figure 2d

BY4741  
(negative control)

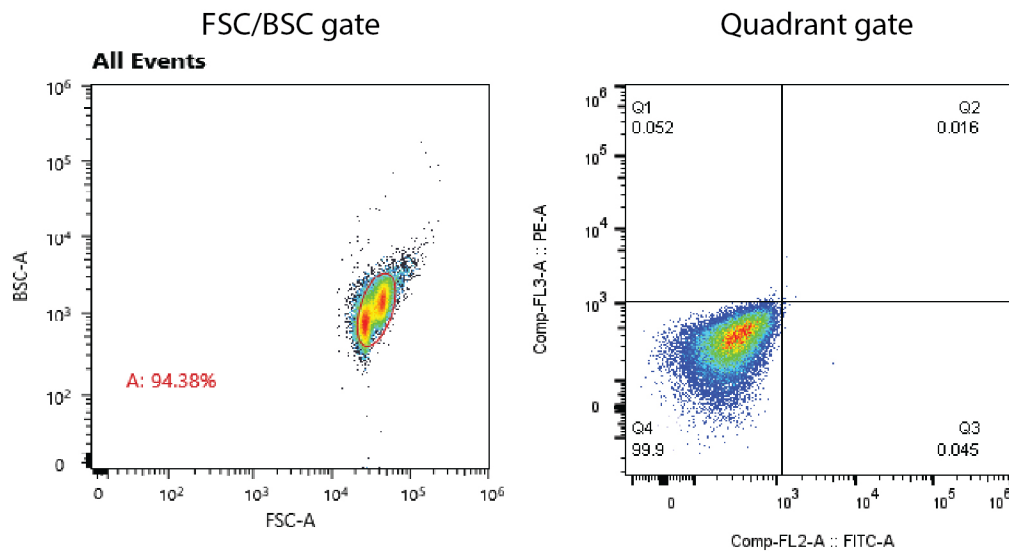

BY4741-GFP  
(positive control)

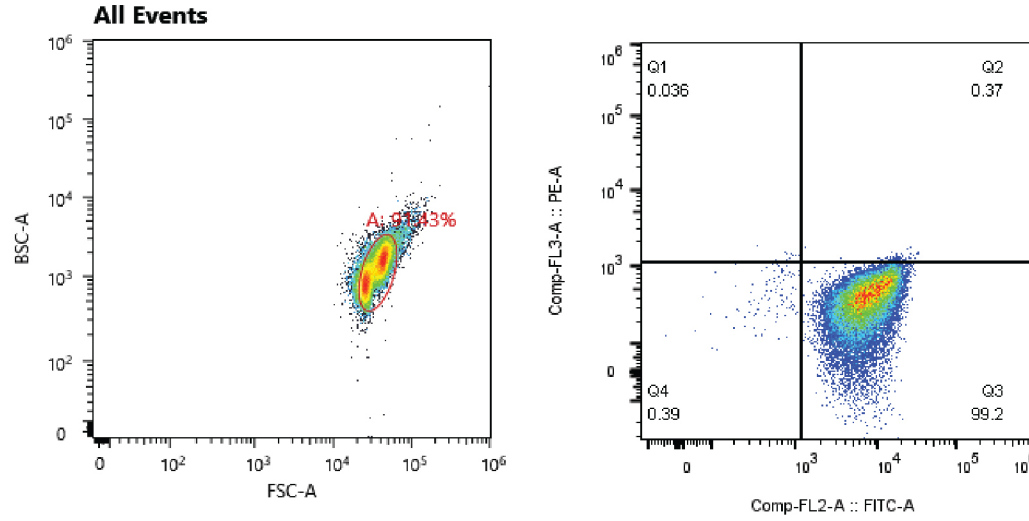

BY4741-dTomato  
(positive control)

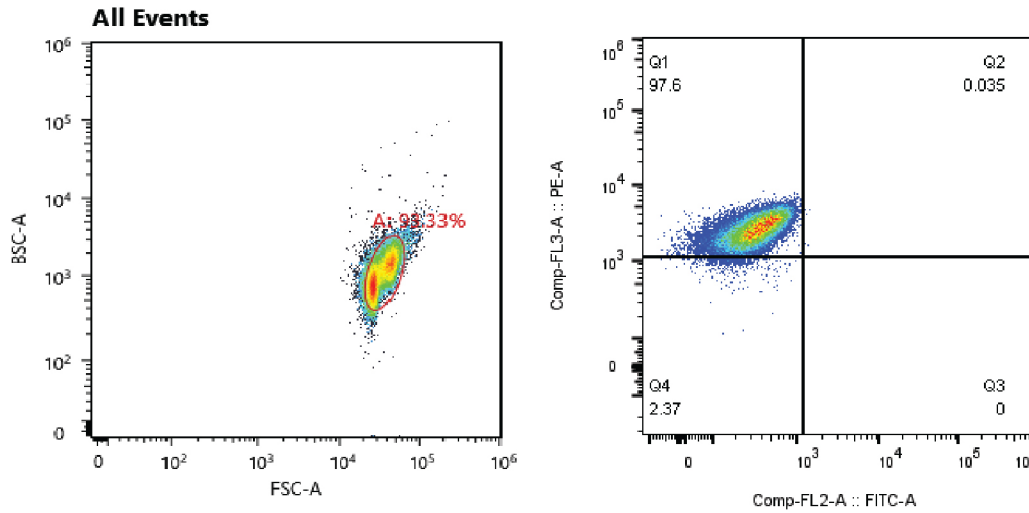

### Supplemental figure1 The gating strategy for flow cytometry

We defined FSC/SSC gates to include more than 90% cells of starting cell population. Positive controls (GFP positive and dTomato positive cells) and negative controls were used to generate a compensation matrix. We applied quadrant gates to quantify the percentage of cells in each population. The FSC/SSC gates, compensation matrix and quadrant gates were set to be the same among different experiments groups for comparison.
